# Supplementary material for: A highly selective fluorescent probe for sulfide ions based on aggregation of Cu nanocluster induced emission enhancement
Source: Royal Society of Chemistry journal article supplement (doi:10.1039/c5an00017c), 2015-01-01
Supplement: c5an00017c1.pdf [file c5an00017c1.pdf]

**Supporting Information for:**

A highly selective fluorescence probe for sulfide ions based on aggregation of Cu nanoclusters induced emission enhancement

By Zenghe Li, Song Guo and Chao Lu\*

*State Key Laboratory of Chemical Resource Engineering, Beijing University of Chemical Technology, Beijing 100029, China. Fax/Tel: 86 010 64411957*

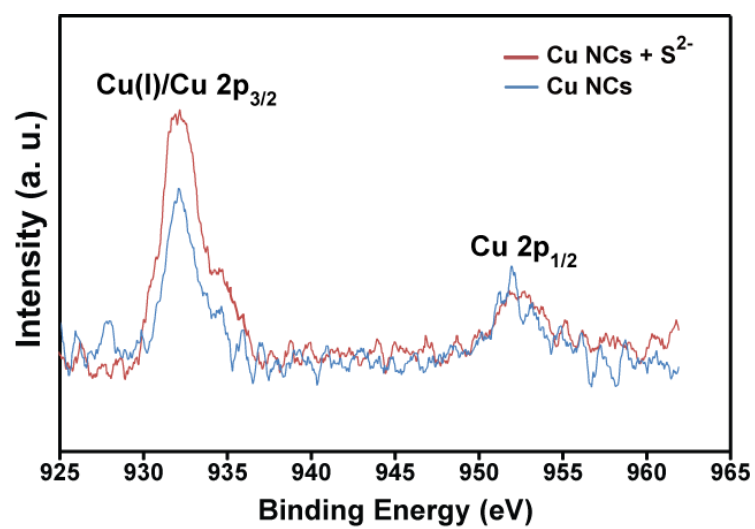

**Fig. S1** XPS spectra of the as-prepared Cu NCs before and after the addition of 50  $\mu\text{M}$  S<sup>2-</sup>.

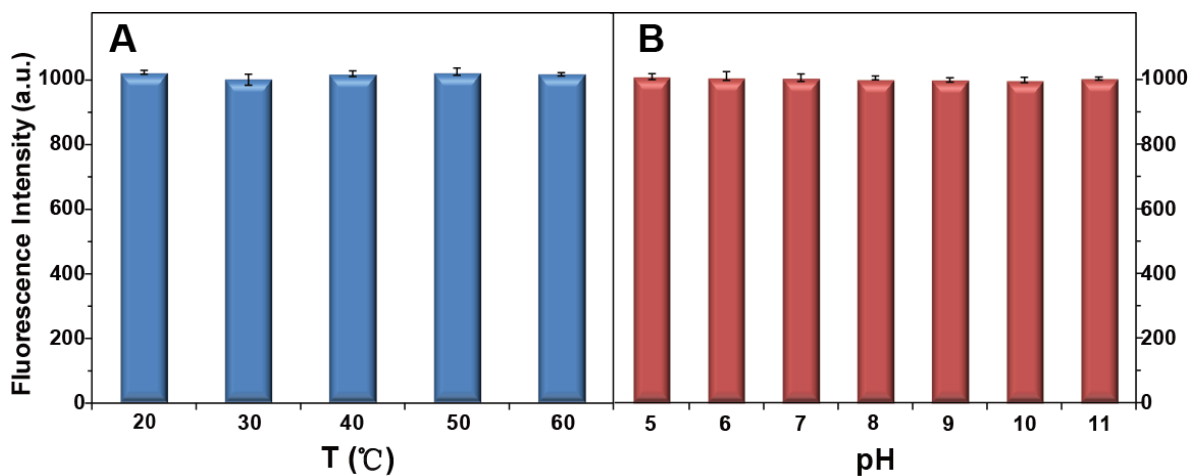

**Fig. S2** (A) Effect of temperature on fluorescence emission intensity at 460 nm of the as-prepared Cu NCs in the absence of H<sub>2</sub>S. (B) Effect of pH on fluorescence emission intensity at 460 nm of the as-prepared Cu NCs in the absence of H<sub>2</sub>S. Error bars were estimated from three independent measurements.

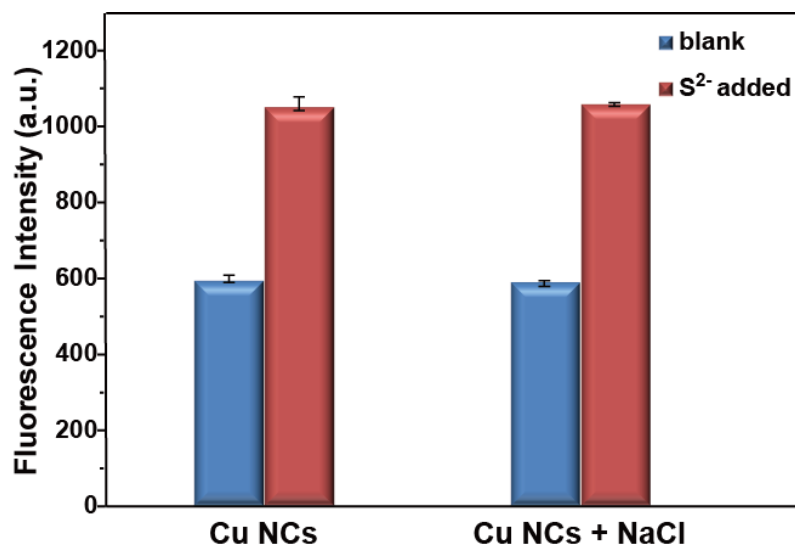

**Fig. S3** Effect of salt with a concentration of 50  $\mu\text{M}$  on the fluorescent properties of the as-prepared Cu NCs in the absence and presence of 50  $\mu\text{M}$   $\text{S}^{2-}$ . All experiments were carried out at 30  $^{\circ}\text{C}$  for 5 min at pH 7.00. Error bars were estimated from three independent measurements.

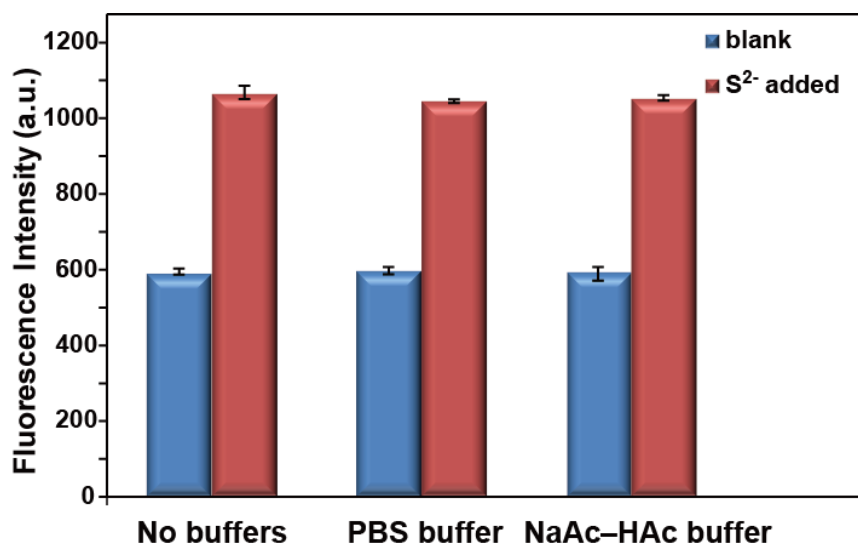

**Fig. S4** Effect of buffer solutions on the fluorescence of the as-prepared Cu NCs in the absence and presence of 50  $\mu\text{M}$   $\text{S}^{2-}$  at pH 7.00. The experiments were taken at 30 °C for 5 min. Error bars were estimated from three independent measurements.
